# Supplementary material for: Steering molecular dipoles from centrosymmetric to a noncentrosymmetric and SHG active assembly using remote functionality and complexationElectronic supplementary information (ESI) available: powder SHG variation with particle size for DMEDQ-TPA. See http://www.rsc.org/suppdata/jm/b2/b202804m/
Source: Royal Society of Chemistry journal article supplement (doi:10.1039/b202804m), 2002-08-05
Supplement: b202804m.doc [file b202804m.doc]

SHG of microcrystalline powder of DMEDQ-TPA at various particle sizes. 1 U = SHG of urea having particle size > 150 m.

| Particle size (m) | SHG / U |
| --- | --- |
| < 100 | 7.4 |
| 100 - 150 | 8.7 |
| 150 - 200 | 8.7 |
| 200 - 250 | 8.7 |
| 250 - 300 | 8.2 |
| > 300 | 9.3 |
